# Supplementary material
Source: PubMed Central journal article supplement (PMC1413785)
Supplement: pnas_0508582103_5.pdf [file pnas_0508582103_5.pdf]

**Table 2. Steady-state kinetic parameters of the apurinic/apyrimidinic (AP) endonuclease, 3'-repair diesterase and nucleotide incision repair (NIR) activities of the Nfo proteins obtained from different preparations**

| Substrate             | Enzymes          |                               |                                                           |                  |                               |                                                           |
|-----------------------|------------------|-------------------------------|-----------------------------------------------------------|------------------|-------------------------------|-----------------------------------------------------------|
|                       | Nfo*             |                               |                                                           | Nfo**            |                               |                                                           |
|                       | $K_M$ , nMb      | $k_{cat}$ , min <sup>-1</sup> | $k_{cat}/K_M$ , min <sup>-1</sup> · $\mu$ M <sup>-1</sup> | $K_M$ , nMb      | $k_{cat}$ , min <sup>-1</sup> | $k_{cat}/K_M$ , min <sup>-1</sup> · $\mu$ M <sup>-1</sup> |
| $\alpha$ A•T          | <b>24 ± 2.1</b>  | <b>14 ± 0.3</b>               | <b>580</b>                                                | <b>38 ± 5.1</b>  | <b>0.85 ± 0.1</b>             | <b>20</b>                                                 |
| THF•T                 | <b>16 ± 2.0</b>  | <b>9.3 ± 1.2</b>              | <b>580</b>                                                | 2.0 ± 0.5        | 5.4 ± 1.1                     | 2,700                                                     |
| 3'THF <sup>NICK</sup> | ND               | ND                            | ND                                                        | 7.7 ± 1.9        | 2.8 ± 0.16                    | 360                                                       |
| $\alpha$ T•A          | <b>7.5 ± 3.0</b> | <b>11.0 ± 0.2</b>             | <b>1,500</b>                                              | <b>42 ± 6.2</b>  | <b>4.8 ± 0.8</b>              | <b>110</b>                                                |
| THF•A                 | <b>3.8 ± 0.8</b> | <b>4.5 ± 0.2</b>              | <b>1,200</b>                                              | <b>8.0 ± 1.0</b> | <b>18 ± 2.2</b>               | <b>2,200</b>                                              |
| DHU•G                 | 41 ± 4.1         | 4.6 ± 0.2                     | 110                                                       | <b>74 ± 7</b>    | <b>0.24 ± 0.02</b>            | <b>3.2</b>                                                |
| DHT•A                 | 13 ± 2.0         | 2.0 ± 0.1                     | 150                                                       | <b>38 ± 8</b>    | <b>0.25 ± 0.01</b>            | <b>6.6</b>                                                |
| 5ohU•G                | 71 ± 11.0        | 0.9 ± 0.06                    | 13                                                        | <b>316 ± 44</b>  | <b>1.6 ± 0.08</b>             | <b>5.1</b>                                                |
| me-Fapy•C             | 290 ± 50         | 2.2 ± 0.1                     | 7.6                                                       | <b>250 ± 70</b>  | <b>0.95 ± 0.1</b>             | <b>3.8</b>                                                |
| THF•G                 | 23 ± 1.8         | 21 ± 0.8                      | 910                                                       | <b>1.3 ± 0.2</b> | <b>1.7 ± 0.1</b>              | <b>1,300</b>                                              |
| (30 mer)              |                  |                               |                                                           |                  |                               |                                                           |

Nfo\* and Nfo\*\* were purified as described in refs. 1 and 2. Kinetic constants values in bold have been published previously (2, 3).  $\alpha$ A,  $\alpha$ -2'-deoxyadenosine;  $\alpha$ T,  $\alpha$ -thymidine; THF, tetrahydrofuran; DHU, 5,6-dihydrodeoxyuridine; DHT, 5,6-dihydrothymidine; 5ohU, 5-hydroxy-2'-deoxyuridine; me-Fapy, 2,6-diamino-4-hydroxy-5-N-methylformamidopyrimidine.

1. Ljungquist, S. (1977) *J. Biol. Chem.* **252**, 2808–2814.
2. Ishchenko, A. A., Sanz, G., Privezentzev, C. V., Maksimenko, A. V. & Saparbaev, M. (2003) *Nucleic Acids Res.* **31**, 6344–6353.
3. Ishchenko, A. A., Ide, H., Ramotar, D., Nevinsky, G. & Saparbaev, M. (2004) *Biochemistry* **43**, 15210–15216.
